# Supplementary material for: Improving insulin resistance by sulforaphane via activating the Bacteroides and Lactobacillus SCFAs–GPR–GLP1 signal axis
Source: Royal Society of Chemistry journal article supplement (doi:10.1039/d4fo01059k), 2024-01-01
Supplement: d4fo01059k2.pdf [file d4fo01059k2.pdf]

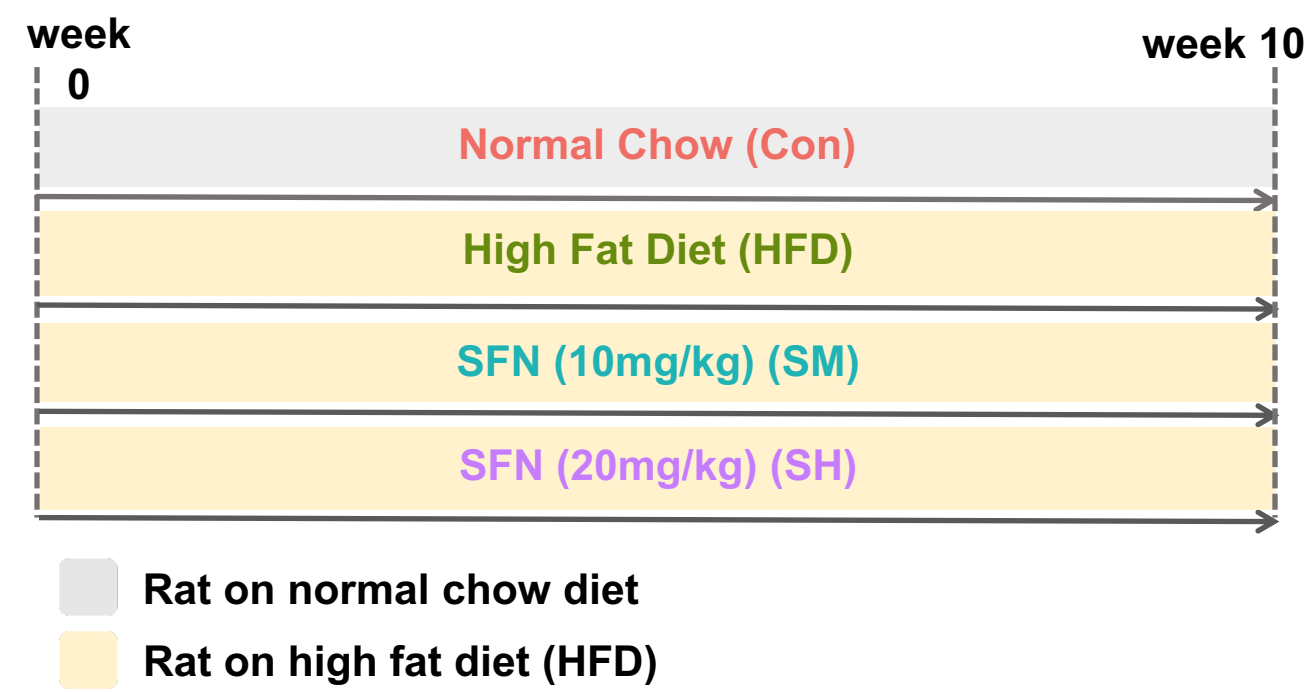

Model Development and Treatment

Supplementary Figure 1

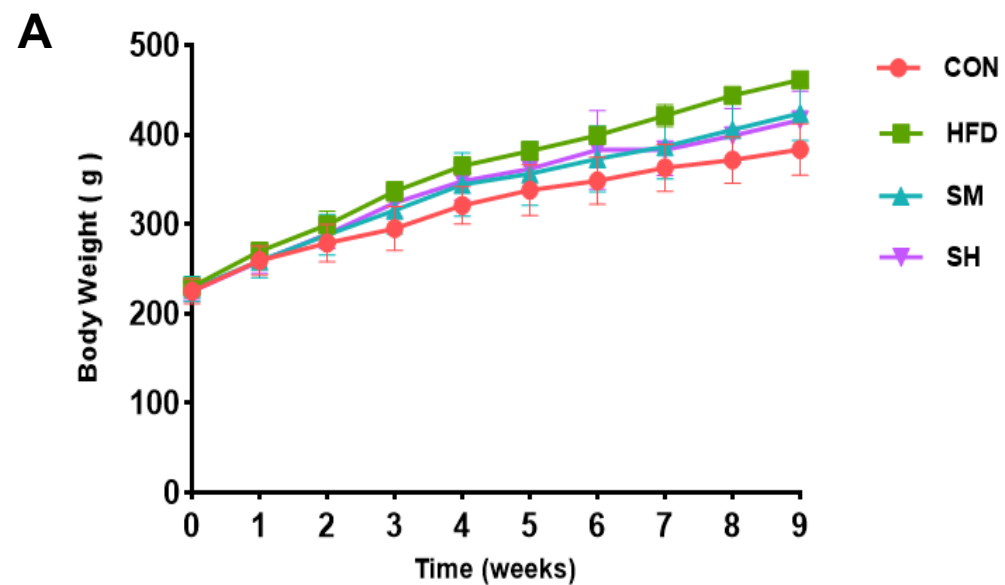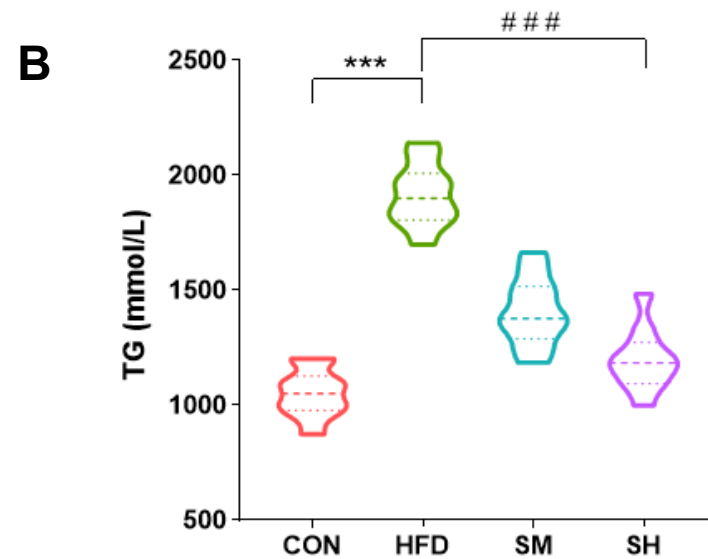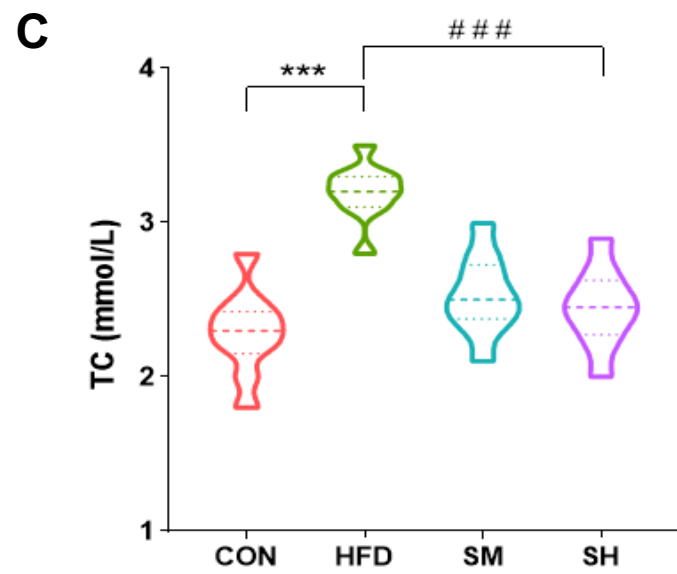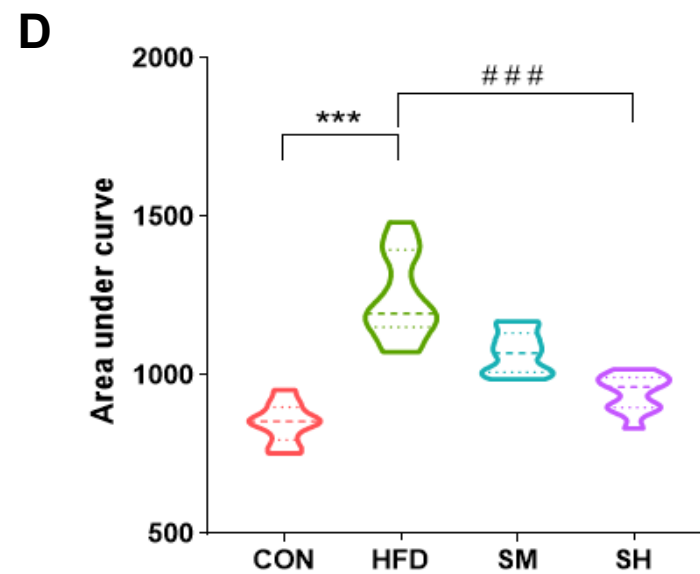

Supplementary Figure 2

**A**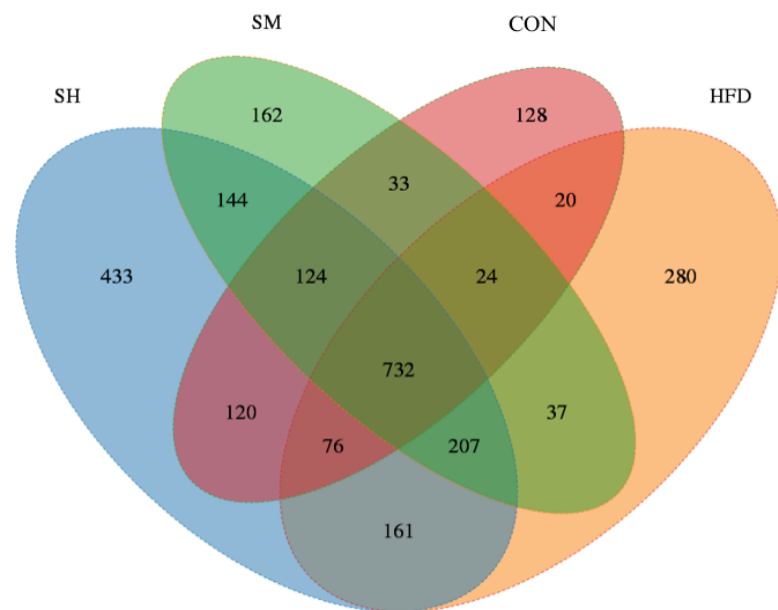**B**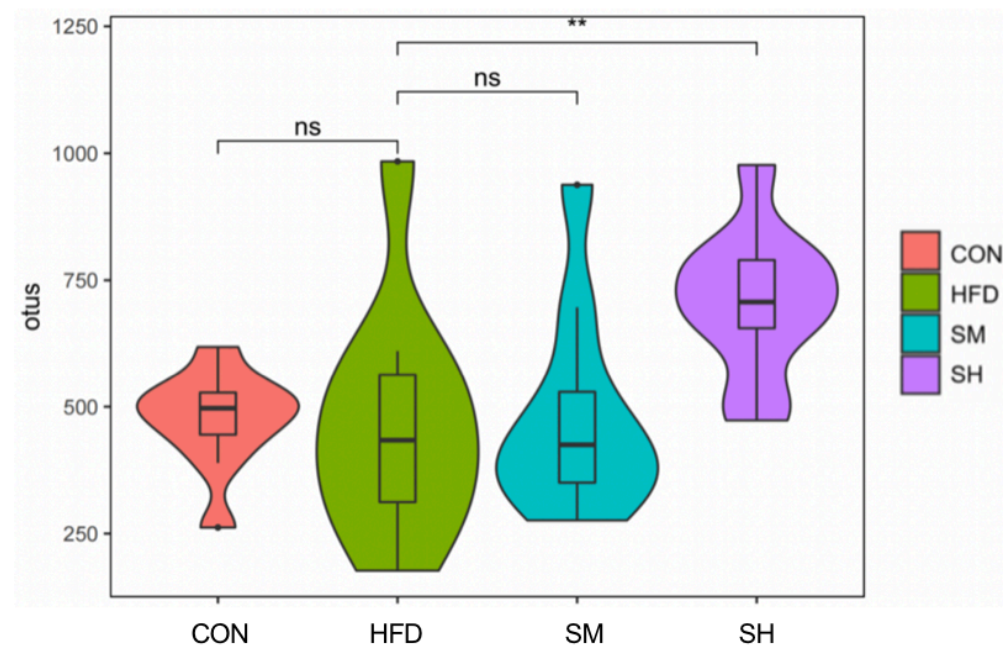**C**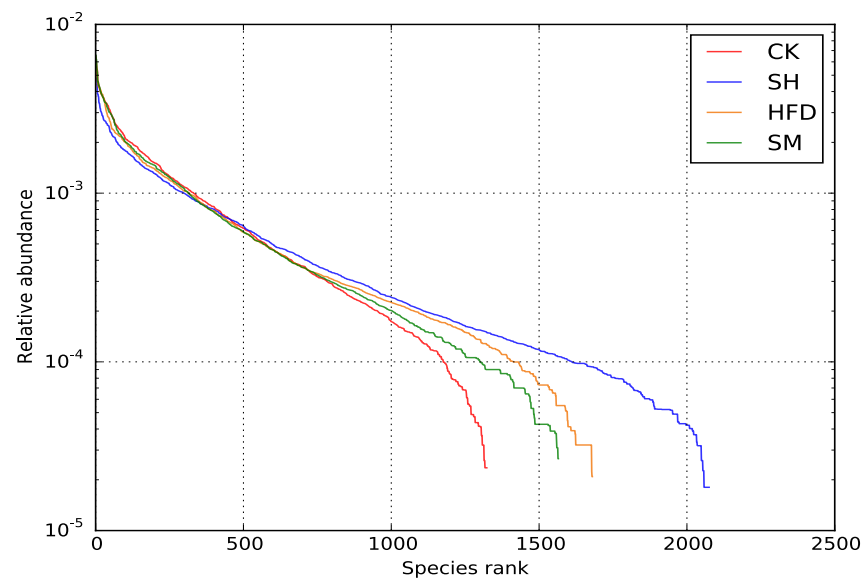**Supplementary Figure 3**

A

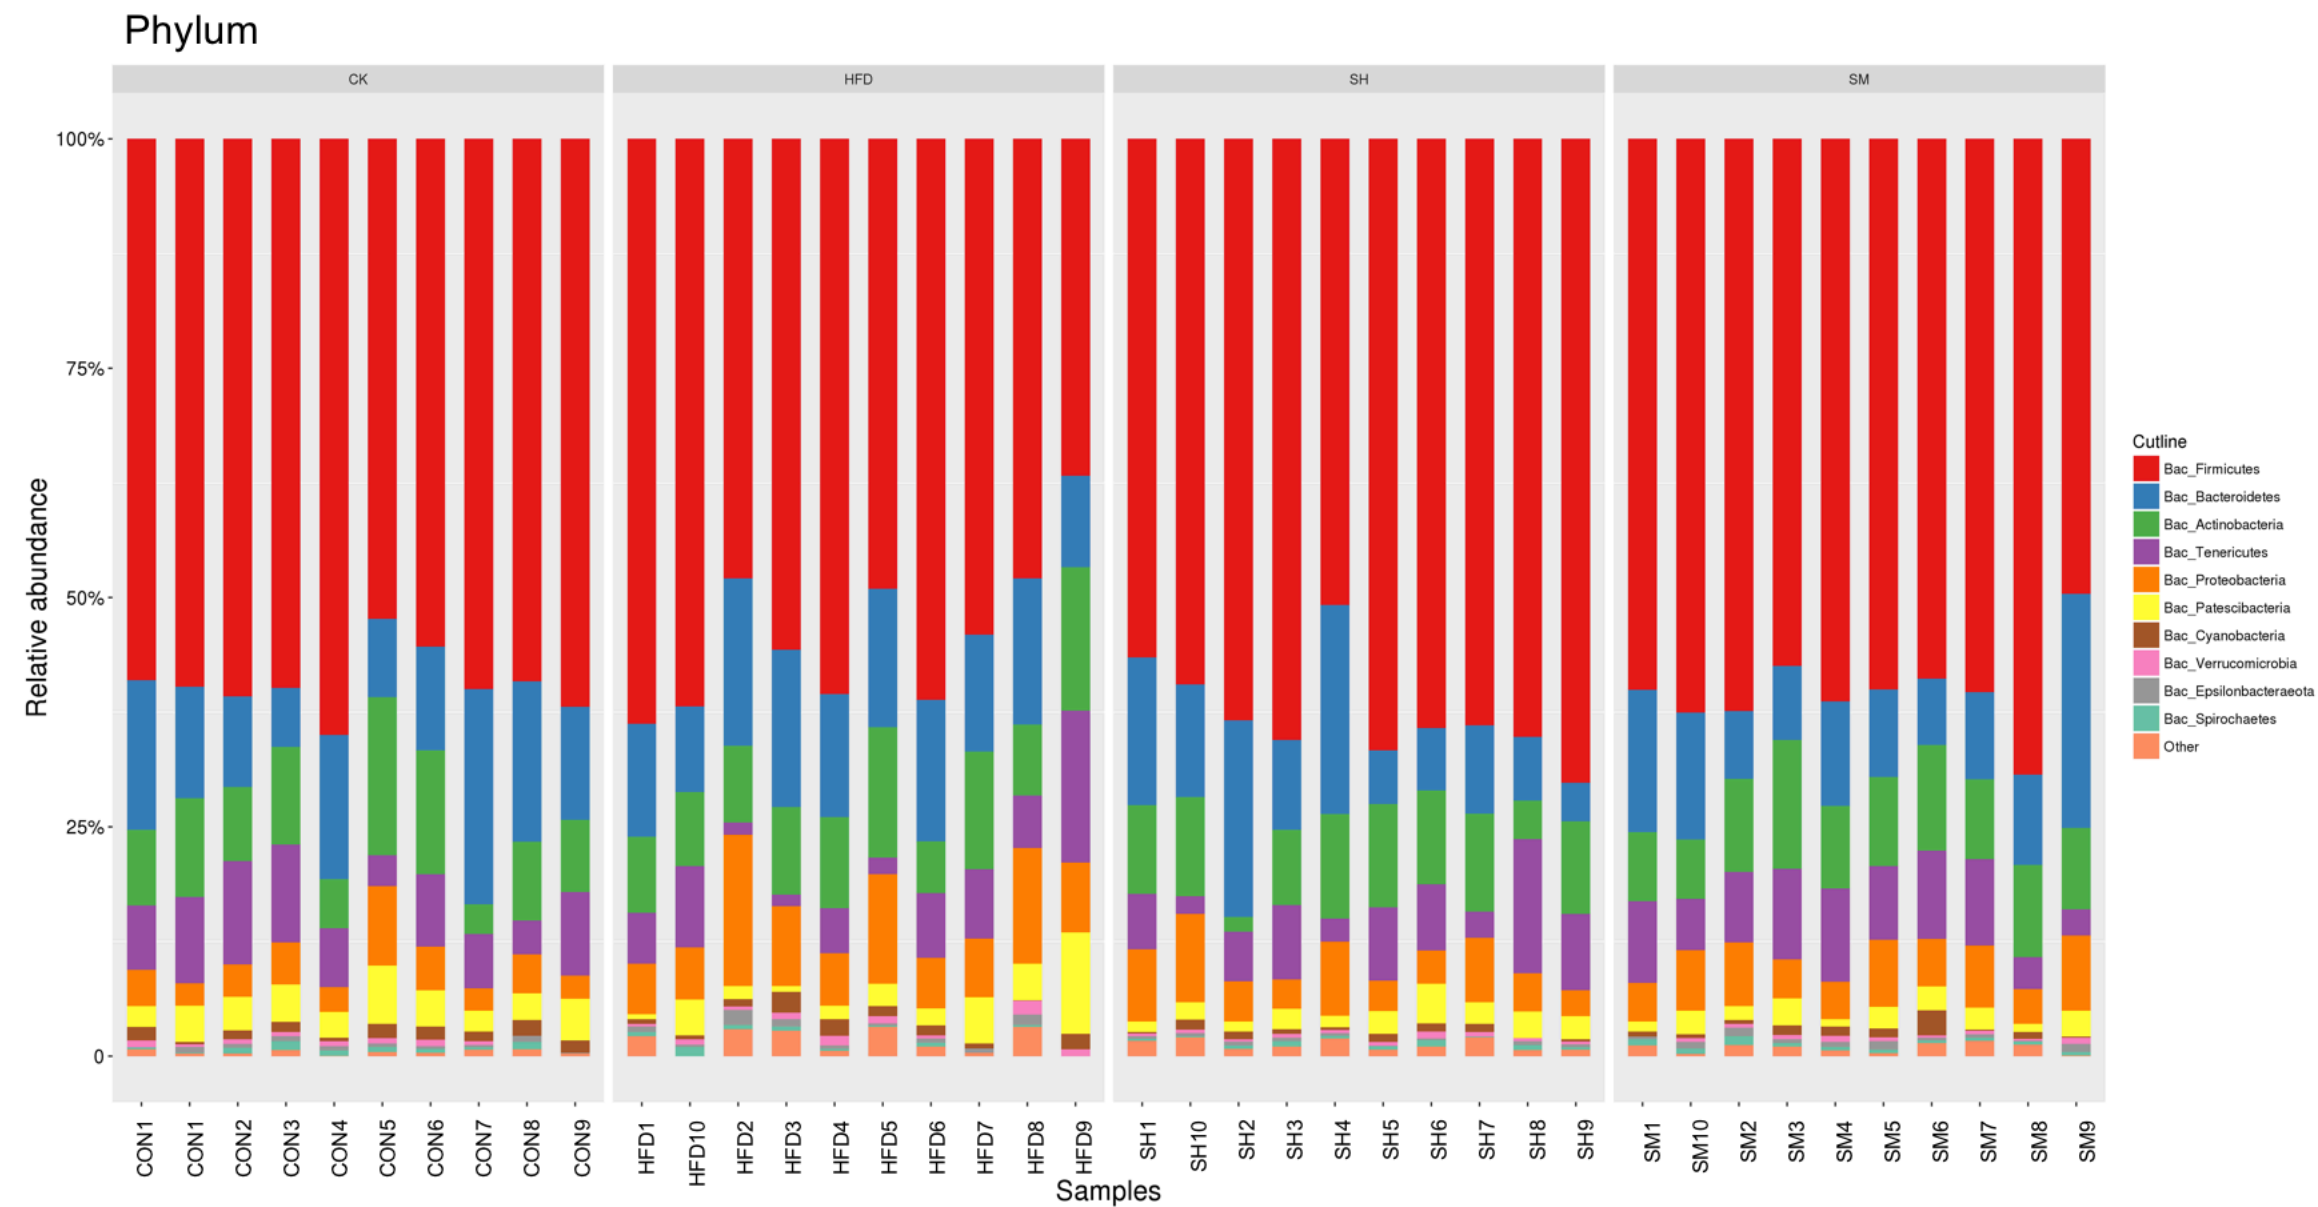

Supplementary Figure 4

B

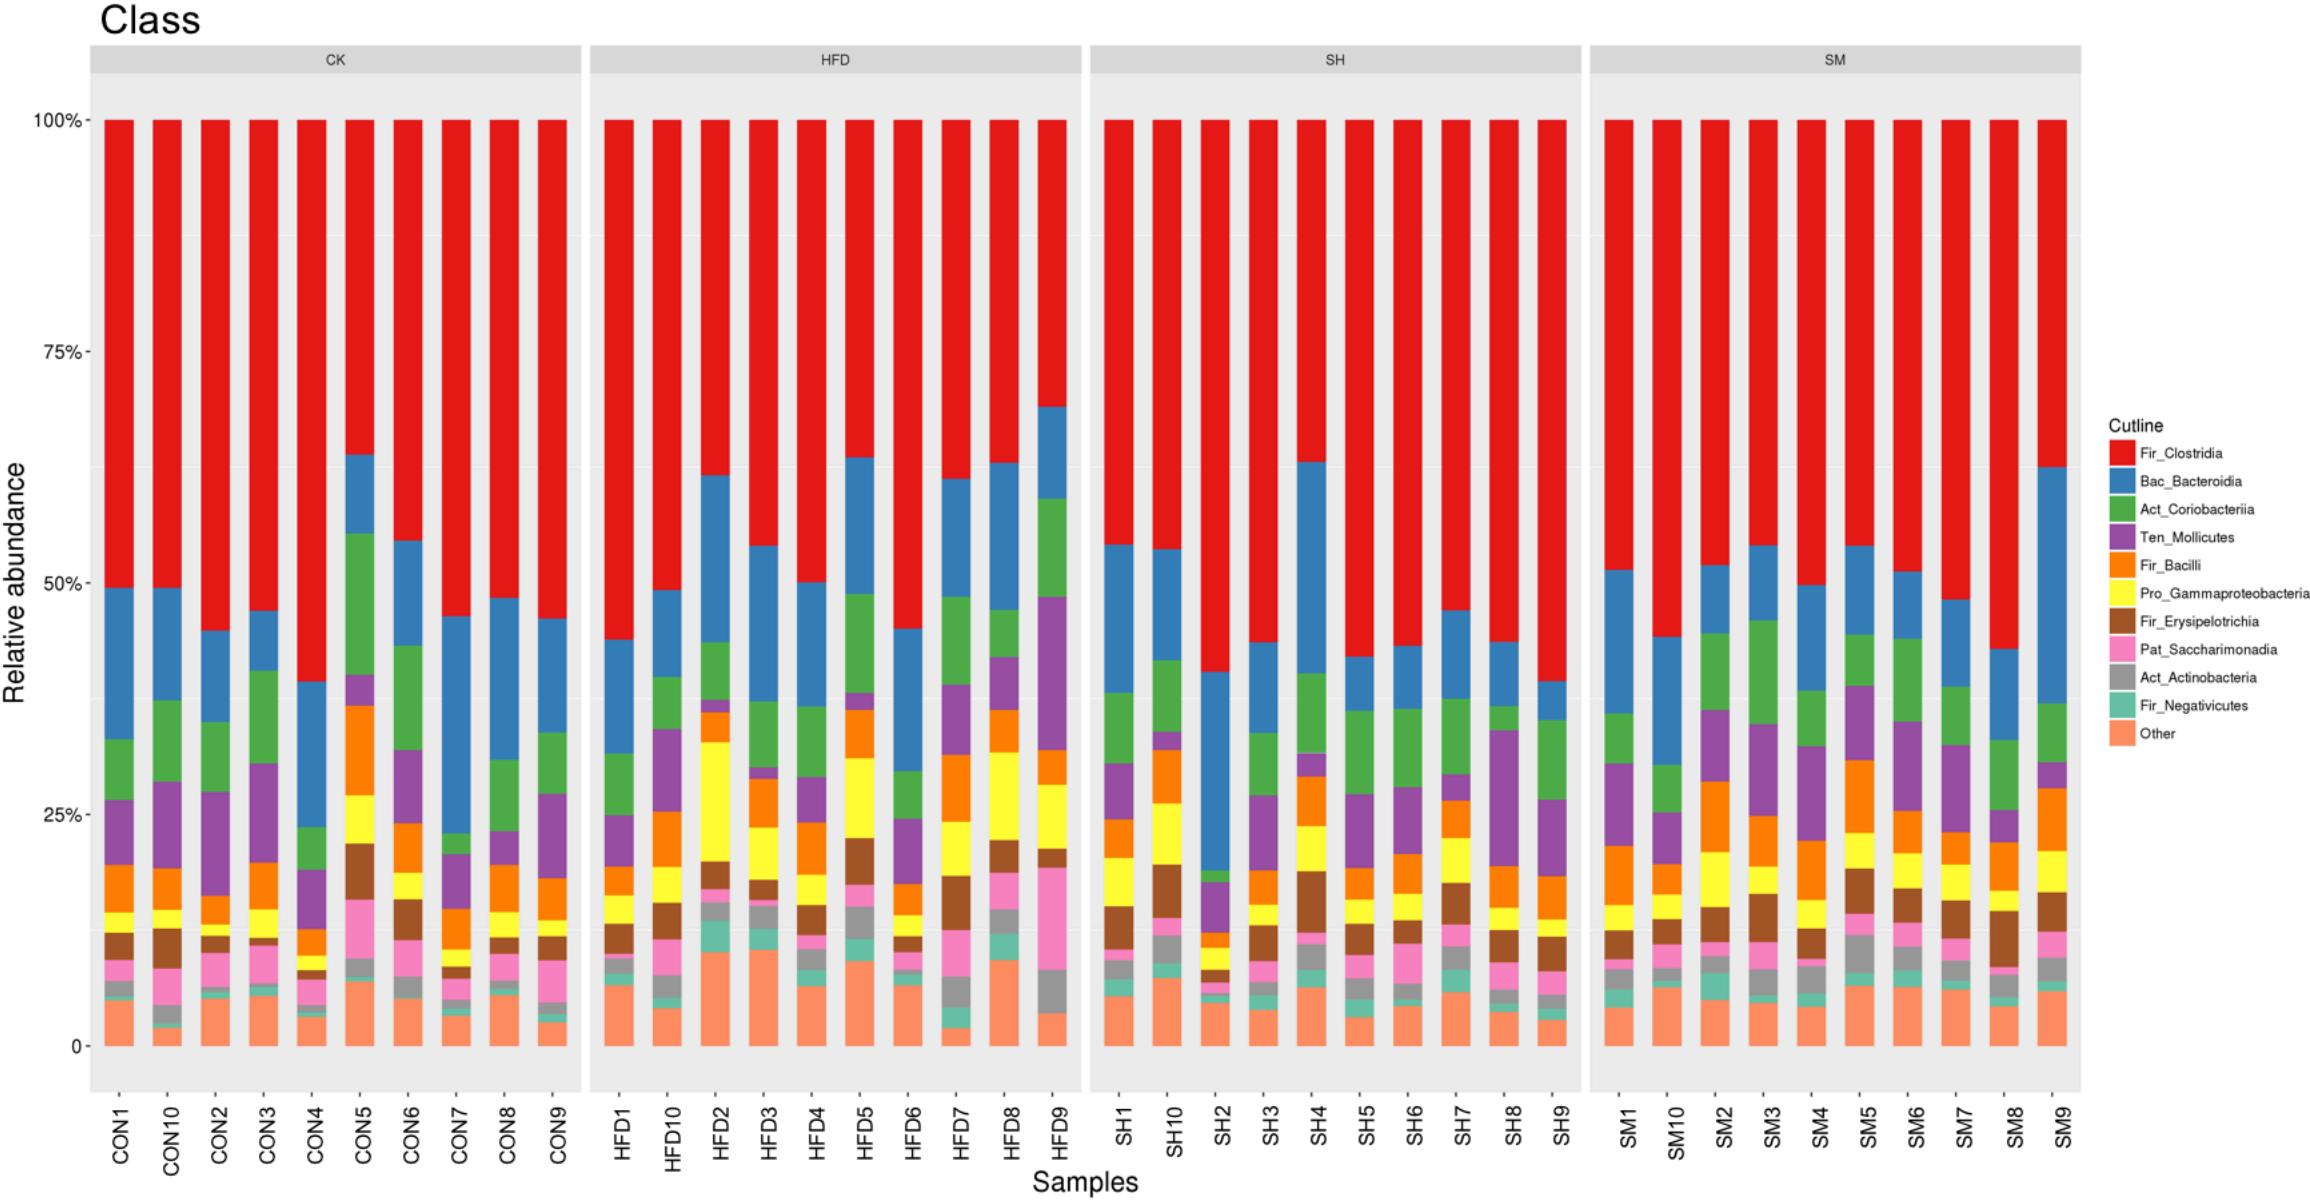

Supplementary Figure 4

C

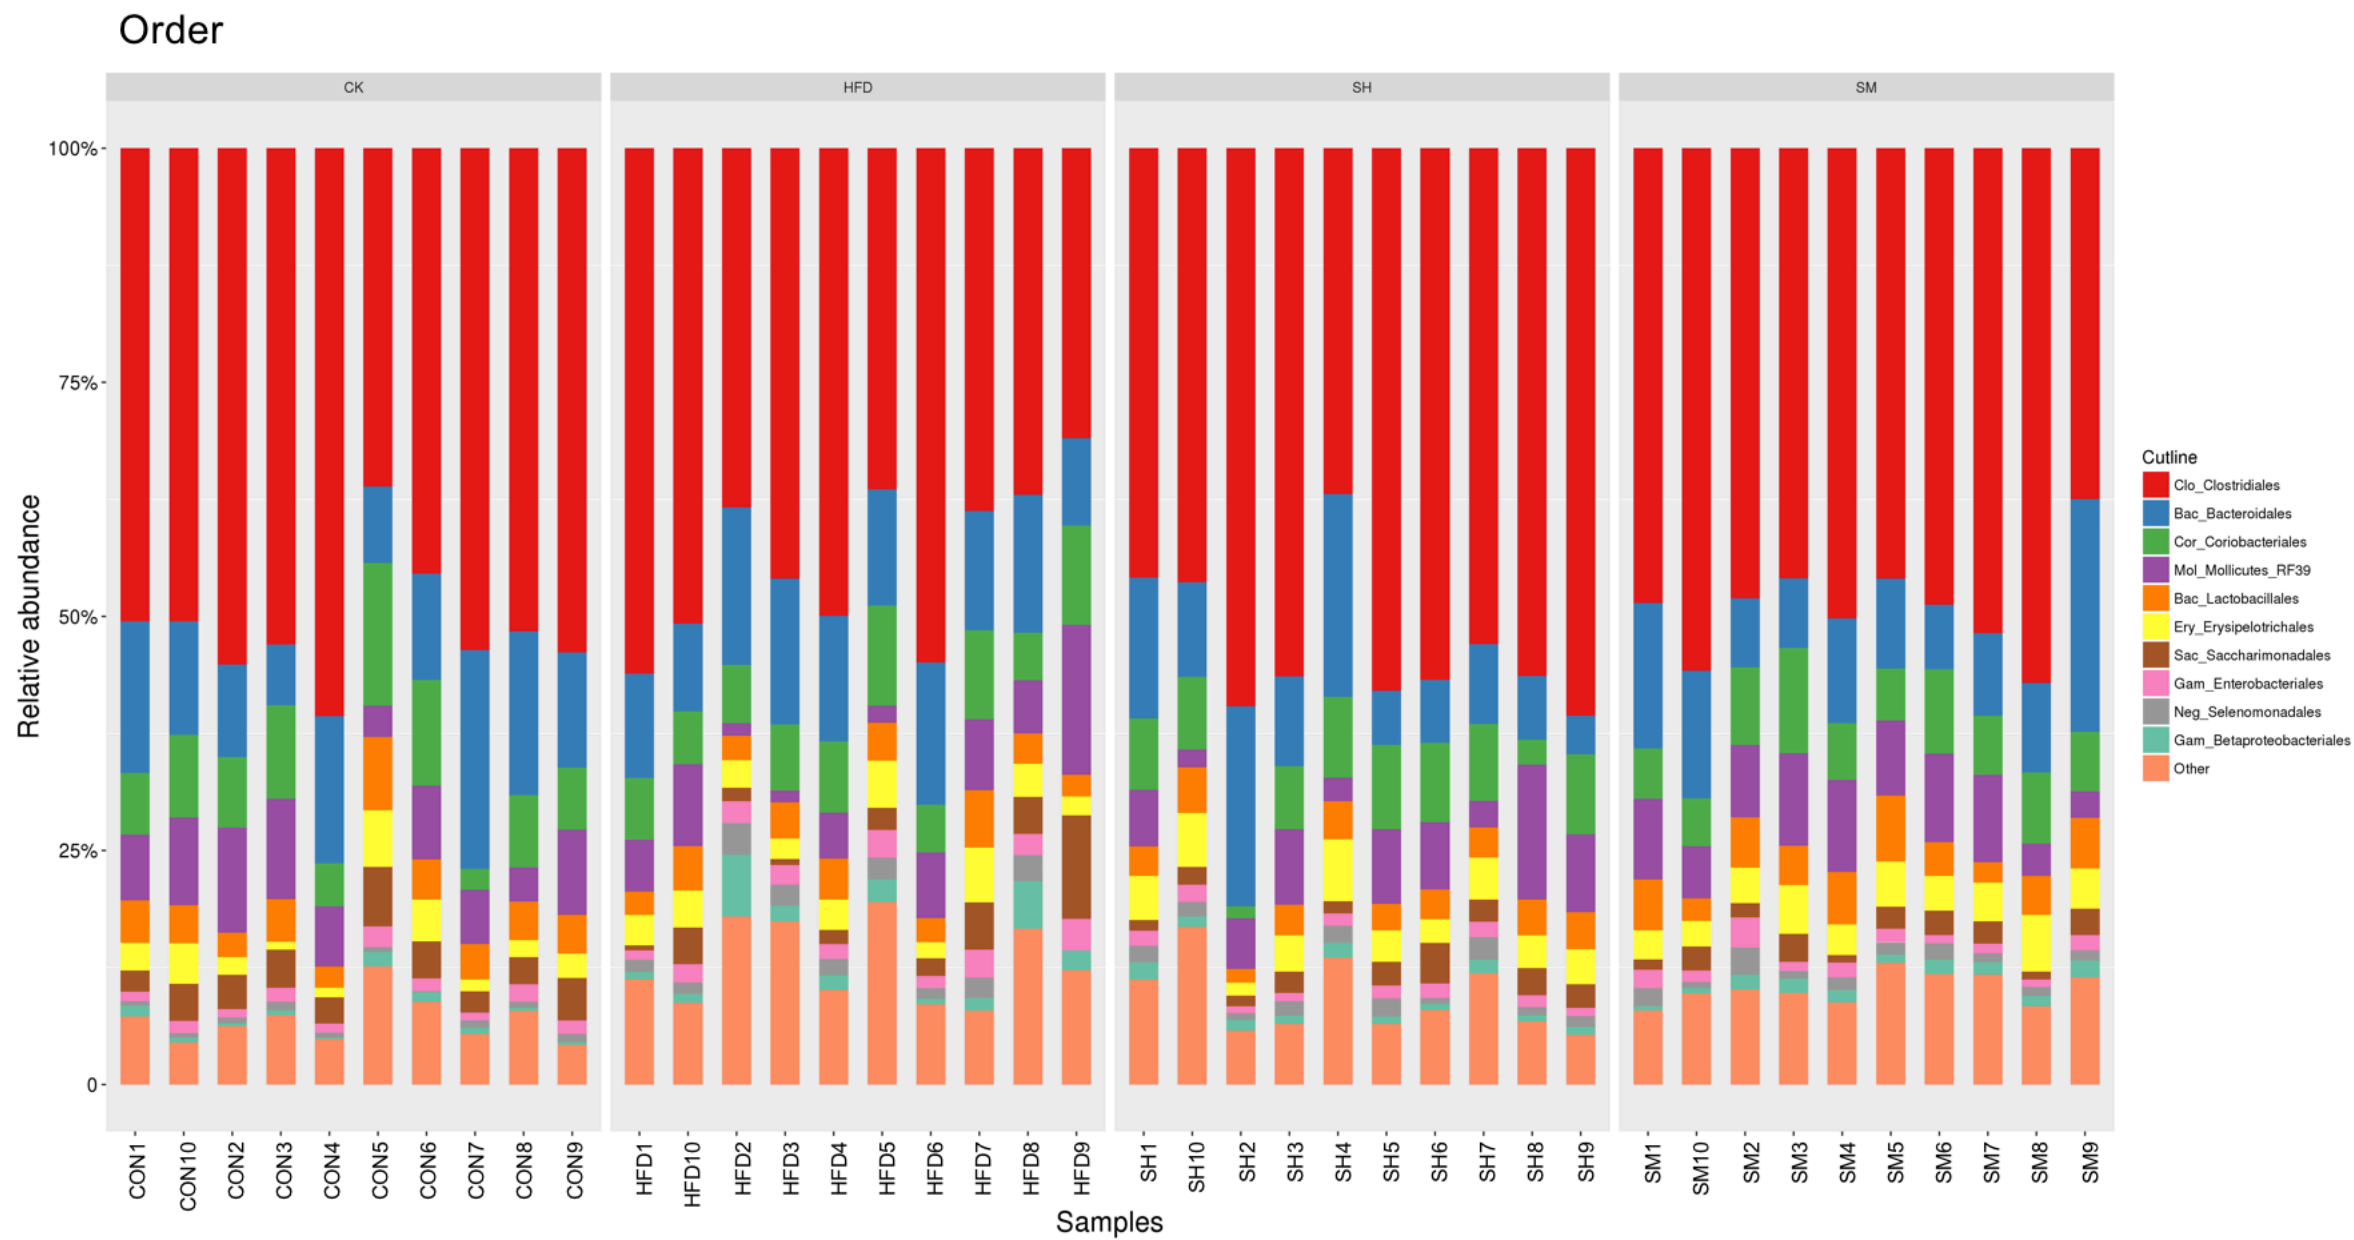

Supplementary Figure 4

D

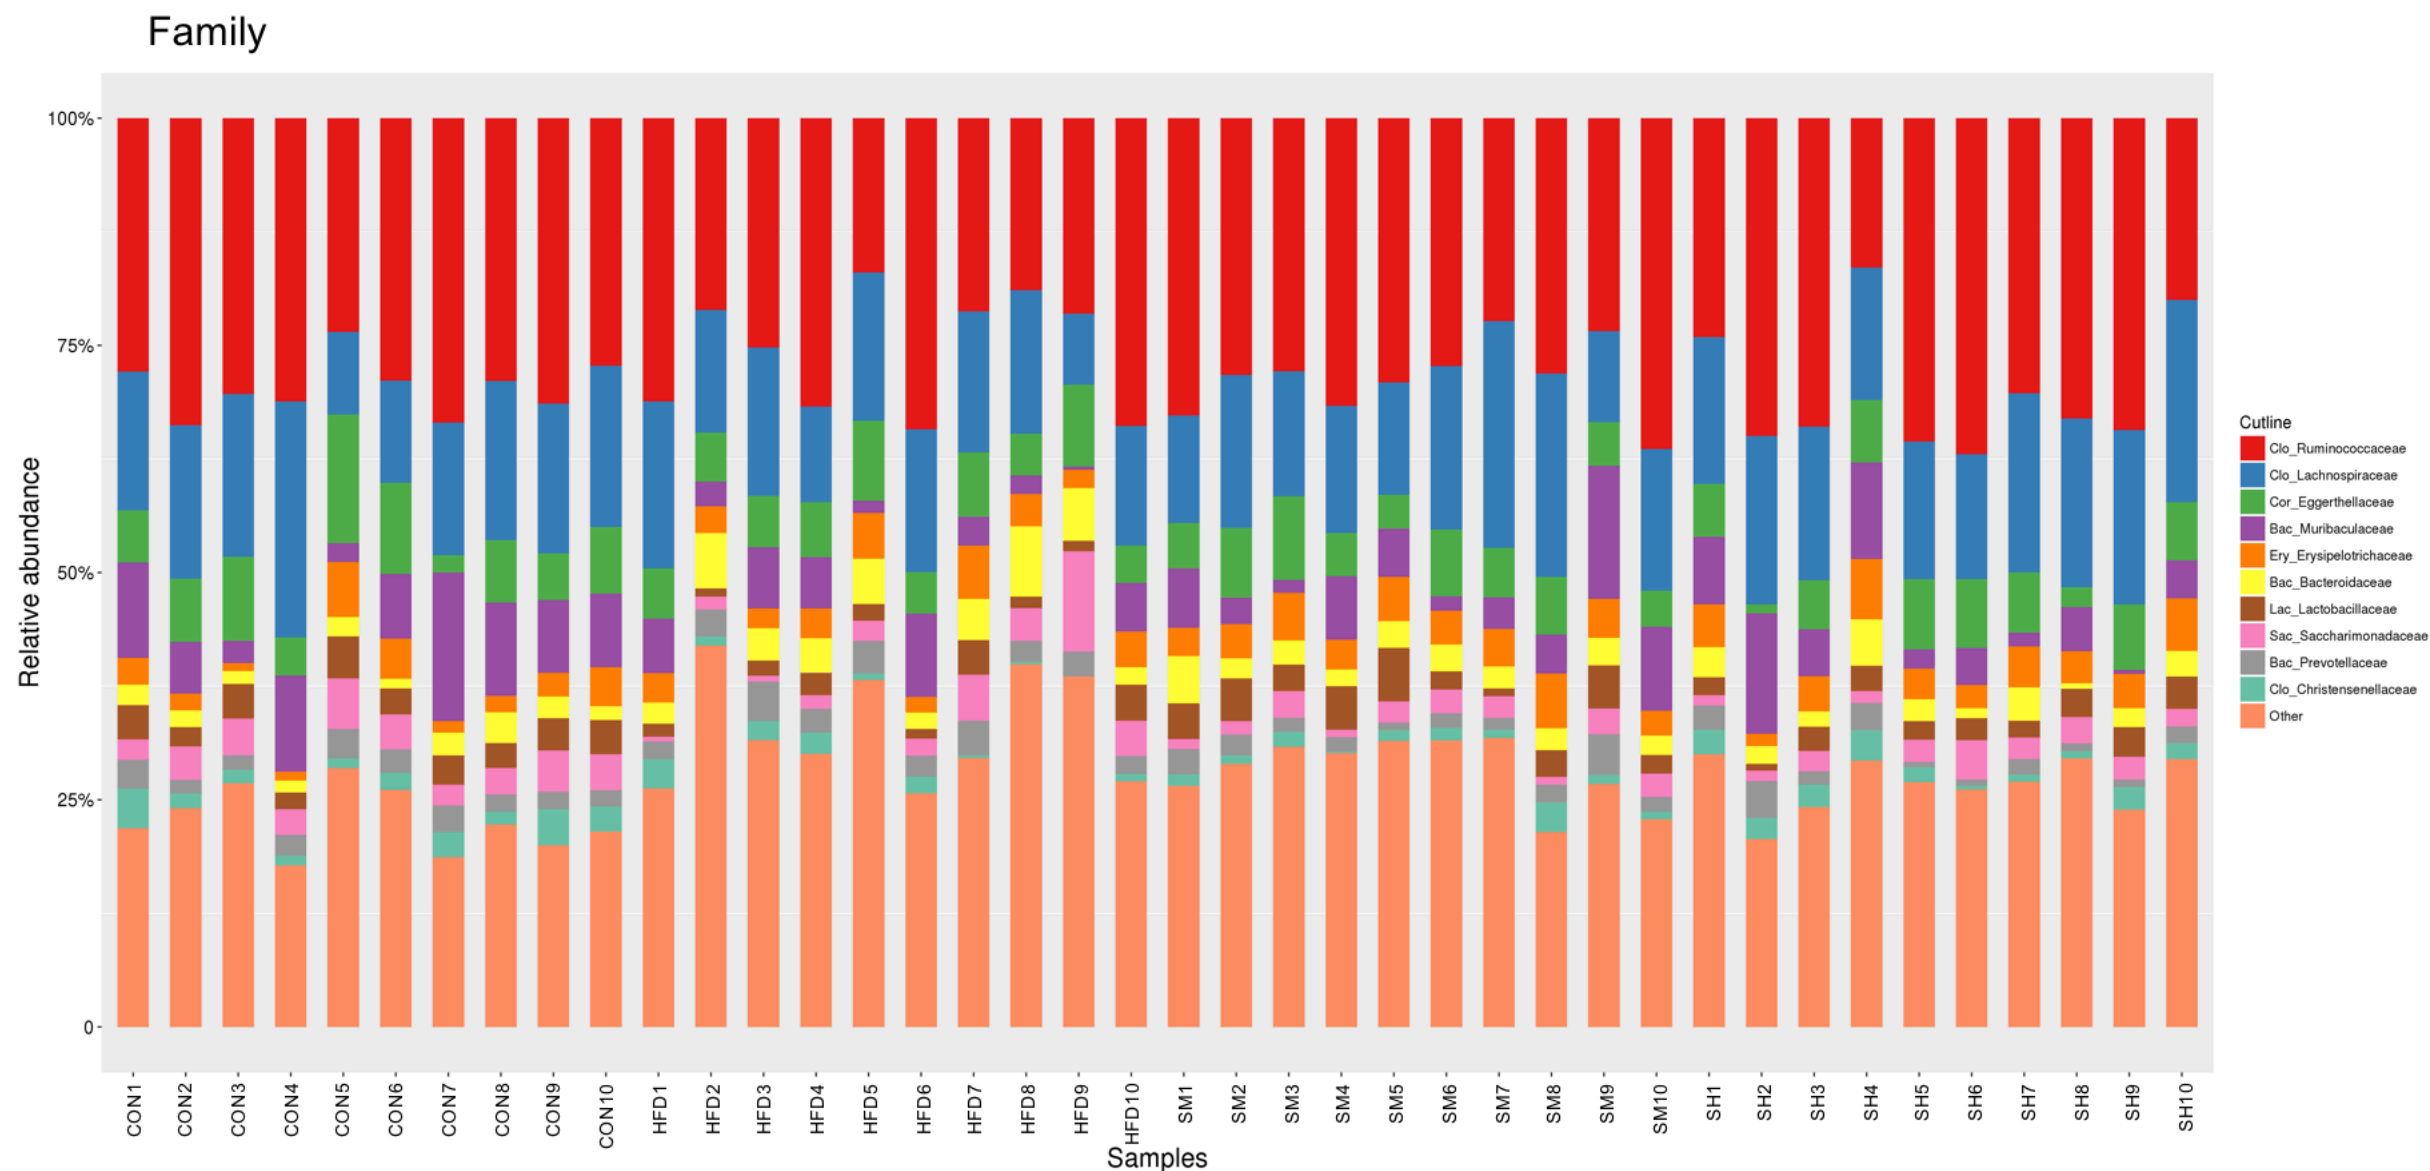

Supplementary Figure 4

E

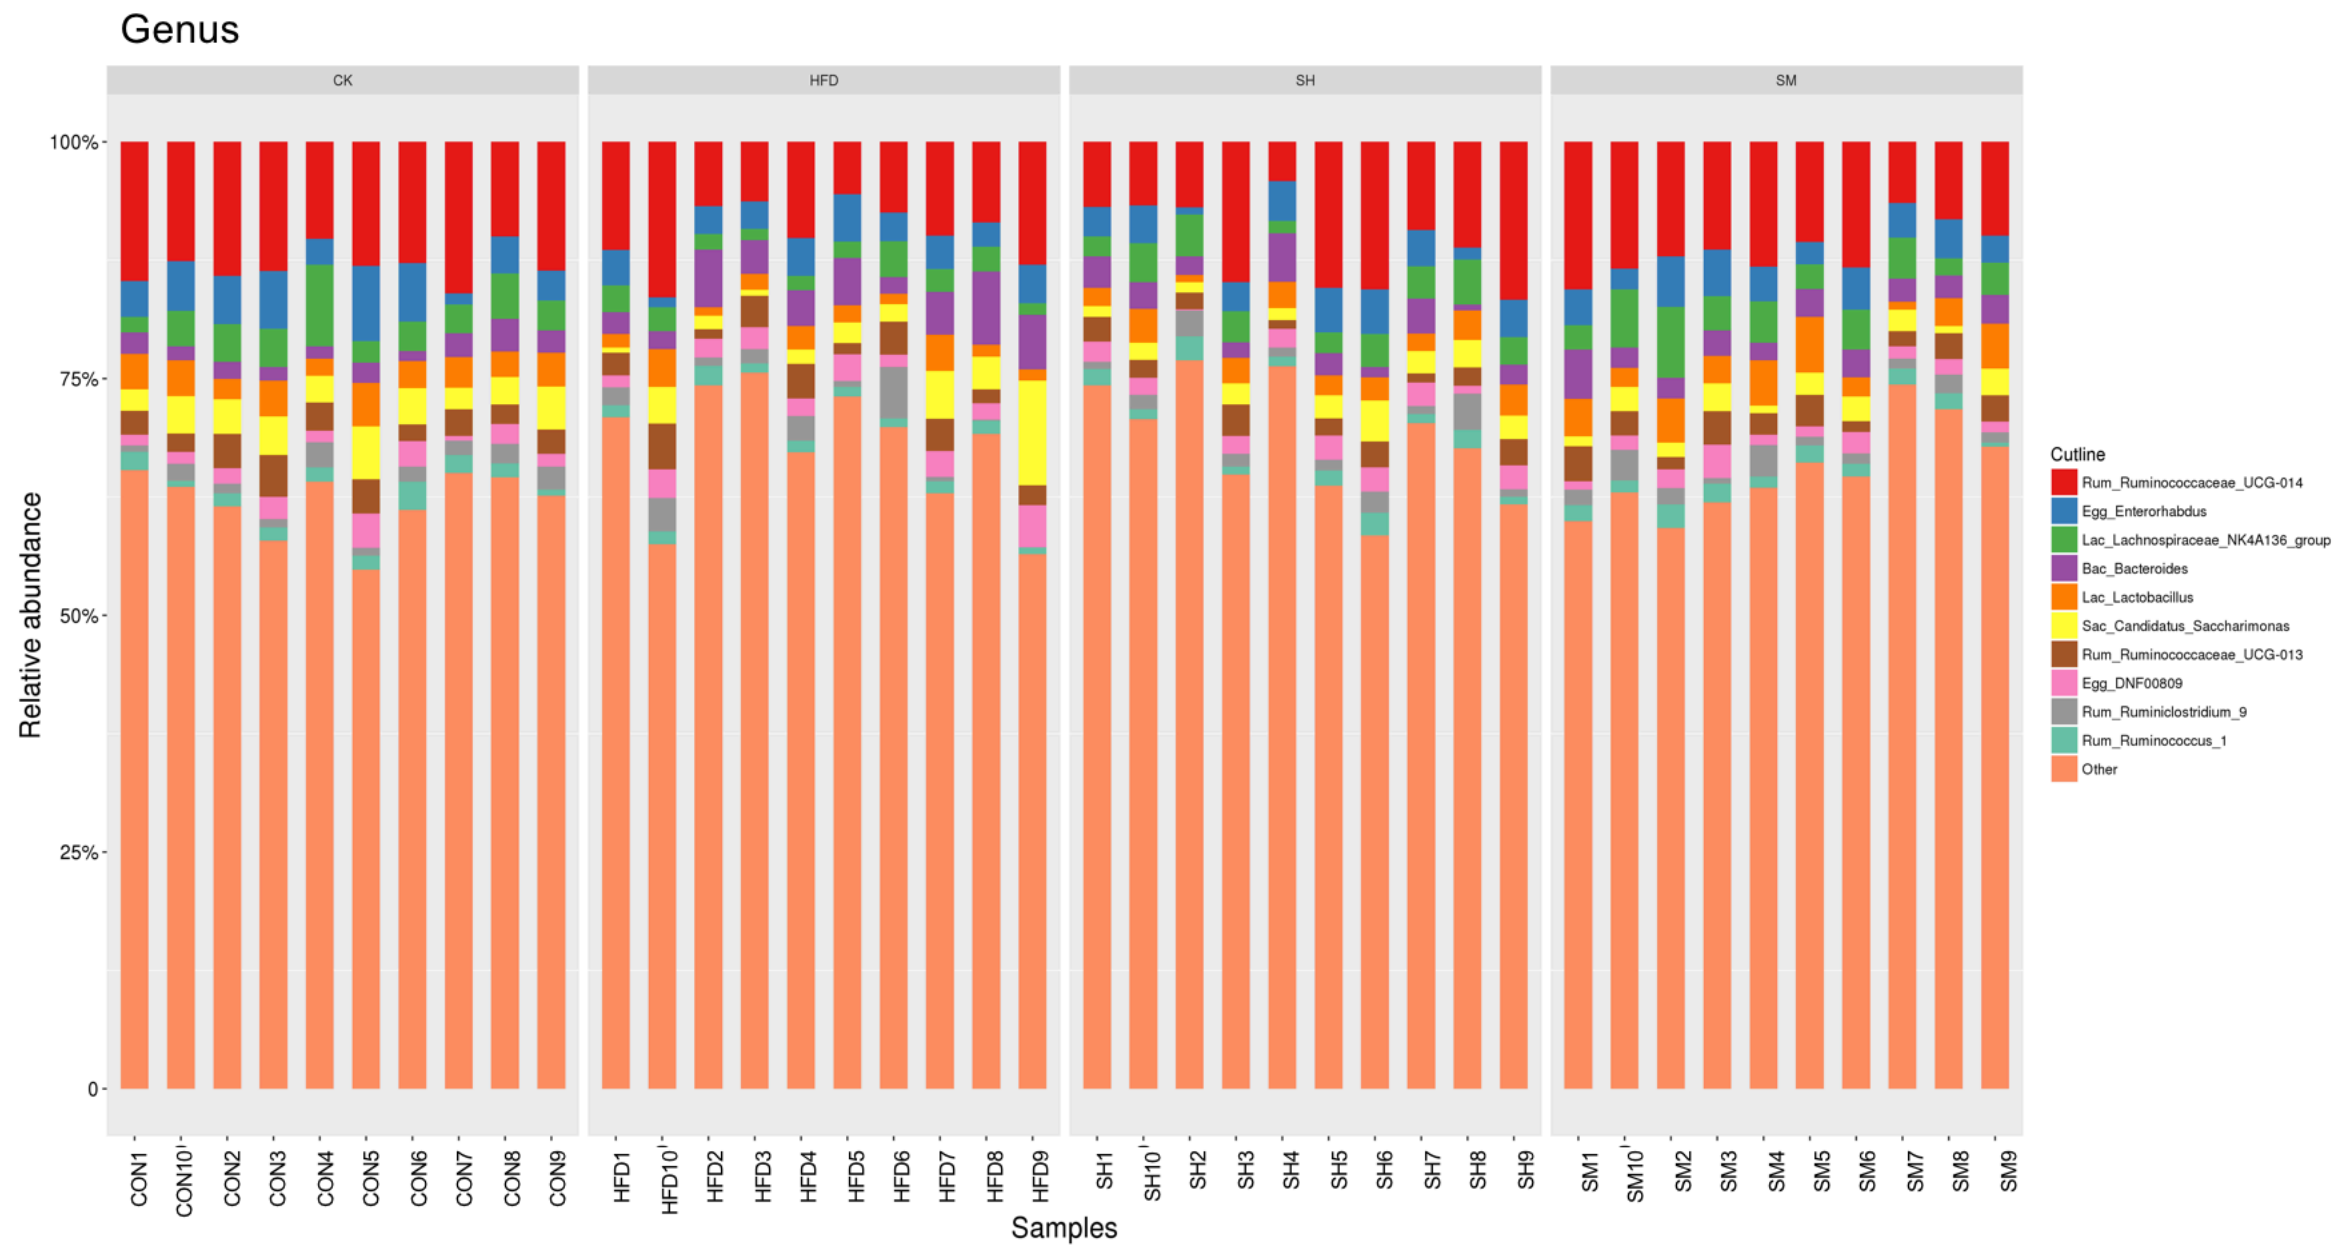

Supplementary Figure 4

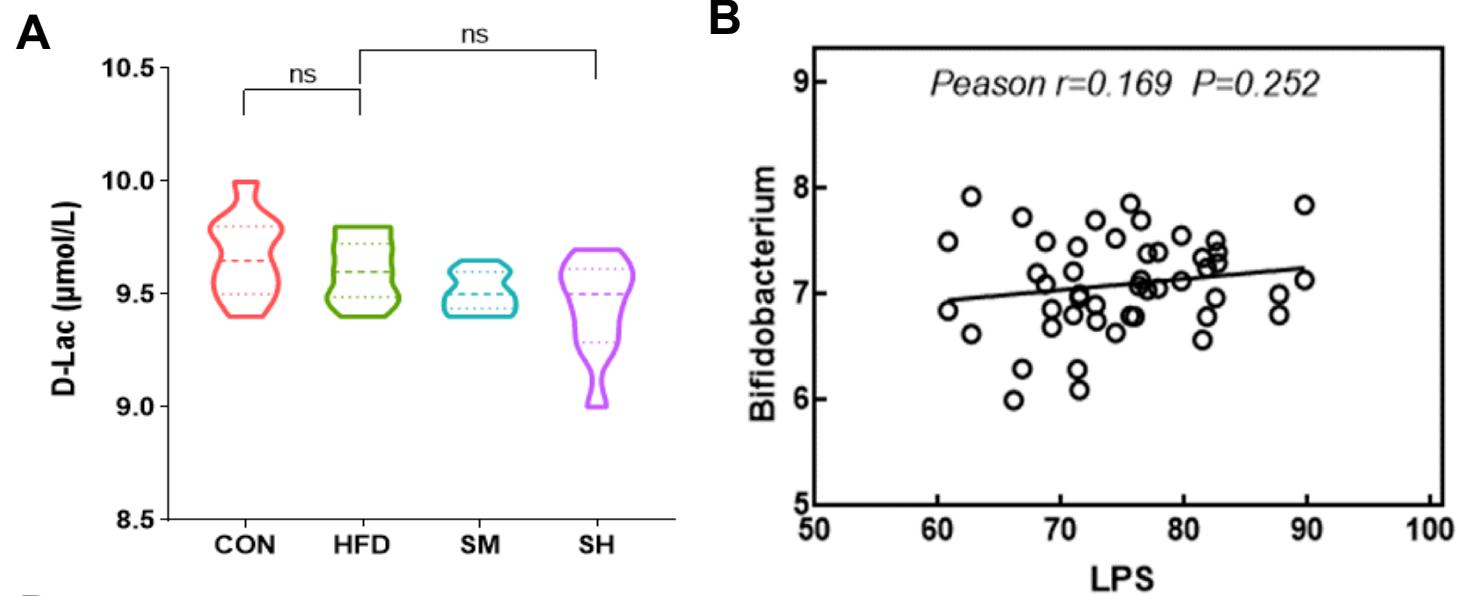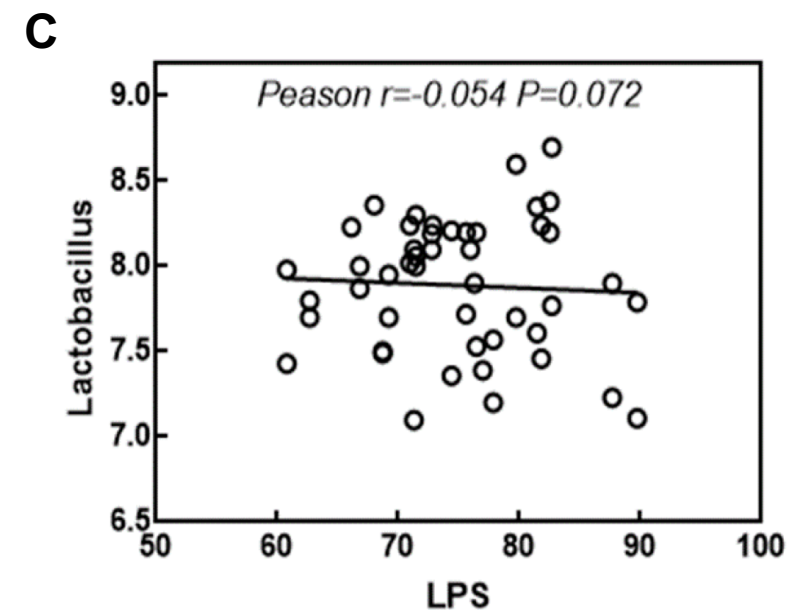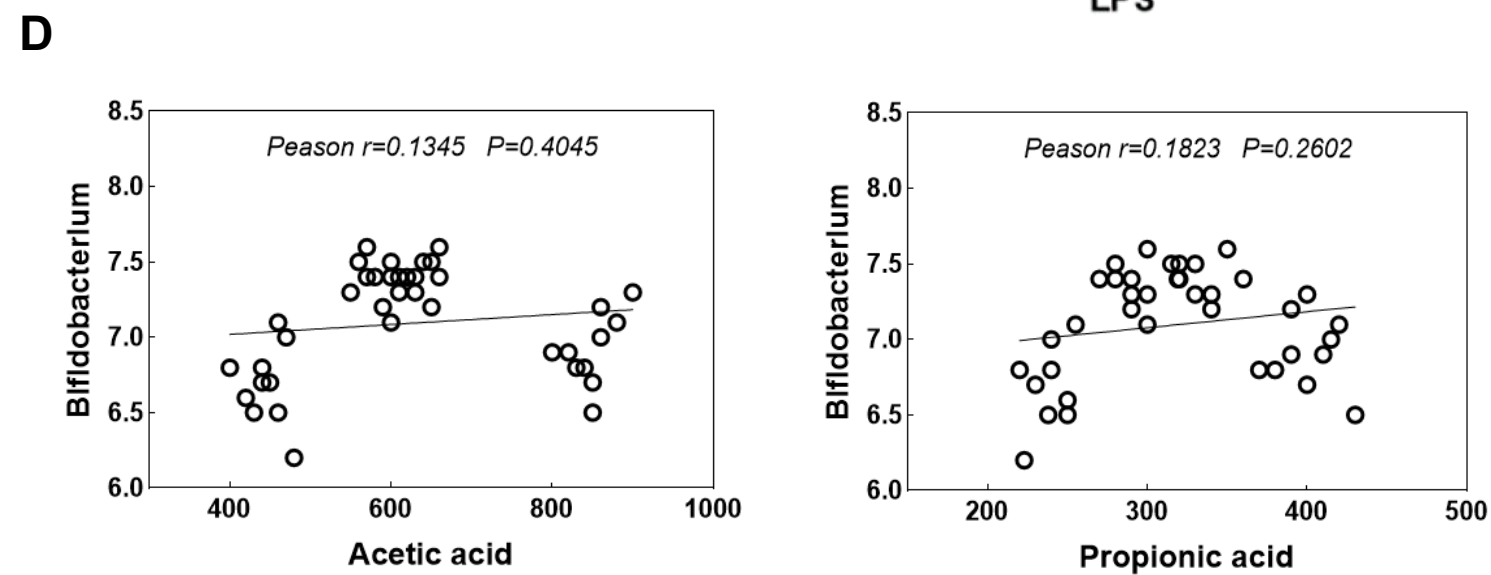

Supplementary Figure 5
